# Supplementary material for: Classification aware neural topic model for COVID-19 disinformation categorisation
Source: PubMed Central journal article supplement (PMC7891716; doi:10.1371/journal.pone.0247086), 2021-02-18
Supplement: pone.0247086.s002.pdf [file pone.0247086.s002.pdf]

## S2 Appendix – The String Matching Process

Values in the IFCN data fields are manually provided by the fact-checkers. Therefore, the raw text may contain typos (e.g. Facebook as Facebok), acronyms (e.g. Facebook as FB) and different terminology or expressions (e.g. Partially False vs Partially True in the Label field). In order to streamline the data, a string matching process is applied to normalise the data in the d. Veracity and h. Originating platform fields.

The String Matching process maps free text into standard unified values defined in this work. The pseudo-code of the cleaning process is illustrated in S Algorithm 1. We created string-mapping lists for each field by manually inspecting text values in the respective field. Each list contains pairs of (standard value, raw word list). The standard value is assigned when the text contains words from the raw word list. An example of a mapping list is shown in S2 Table, where the first column contains the standard values, and the second column are the lists of raw words. For example, the Facebook acronym ‘FB’ or typo ‘faceboos’ in the raw text will map to the standard value “Facebook”. The full matching list is shared with the source code

---

### S Algorithm 1: String Matching Process

---

**Input** : ClaimOrigin, Label

**Output** : cleanedClaimOrigin, cleanedLabels

**Function** *valueMapping(text, mappingList)*:

```

organisedValues = [];
for words in text do
  for StandardValue in mappingList do
    if word in mappingList[StandardValue] then
      organisedValues.append(StandardValue)
    end
  end
end
return organisedValues;

```

**end**

cleanedLabels = valueMapping(Label, LabelMappingList);

cleanedClaimOrigin = valueMapping(ClaimOrigin, LabelMappingList);

---

| Standard value            | Raw word list                                    |
|---------------------------|--------------------------------------------------|
| Claim Origin Mapping List |                                                  |
| Facebook                  | FB, faceboos, facebook,facebok ...               |
| YouTube                   | youtube, youtuber                                |
| ...                       | ...                                              |
| Label Mapping List        |                                                  |
| False                     | Pants on Fire!, False, Fake news, Incorrect, ... |
| Partially False           | Partially correct, mostly false, half truth, ... |
| ...                       | ...                                              |
| Media Type Mapping List   |                                                  |
| Image                     | photo, photograph, image, picture, ...           |
| Audio                     | radio, audio                                     |
| ...                       | ...                                              |

**S2 Table.** Example String Matching list
