# Supplementary material for: Classification aware neural topic model for COVID-19 disinformation categorisation
Source: PubMed Central journal article supplement (PMC7891716; doi:10.1371/journal.pone.0247086), 2021-02-18
Supplement: pone.0247086.s005.pdf [file pone.0247086.s005.pdf]

## S5 Appendix - Deriving the ELBO

This section describes the details of  $ELBO_{x_{bow}}$  and  $ELBO_{x_{bow}, \hat{y}}$  derivation and calculation.

$$\begin{aligned}
z &\sim q(z|x) \\
\log p(x_{bow}) &= \mathbb{E}_z \log p(x_{bow}) \\
&= \mathbb{E}_z [\log p(x_{bow}, z)] - \mathbb{E}_z [\log p(z|x_{bow})] \\
&= \mathbb{E}_z \left[ \log \frac{p(x_{bow}, z)}{q(z|x)} \right] - \mathbb{E}_z \left[ \log \frac{p(z|x_{bow})}{q(z|x)} \right] \\
&= EBLO_{x_{bow}} - D_{KL}(p(z|x_{bow})||q(z|x)) \\
&= EBLO_{x_{bow}} + D_{KL}(q(z|x)||p(z|x_{bow}))
\end{aligned}$$

$$\begin{aligned}
ELBO_{x_{bow}} &= \mathbb{E}_z [\log p(x_{bow}, z)] - \mathbb{E}_z [\log q(z|x)] \\
&= \mathbb{E}_z [\log p(x_{bow}|z)] + \mathbb{E}_z [\log p(z)] - \mathbb{E}_z [\log q(z|x)] \\
&= \mathbb{E}_z [\log p(x_{bow}|z)] - D_{KL}(q(z|x)||p(z))
\end{aligned}$$

$$\begin{aligned}
z_s &\sim q(z|x, \hat{y}) \\
\log p(x_{bow}, \hat{y}) &= \mathbb{E}_{z_s} \log p(x_{bow}, \hat{y}) \\
&= \mathbb{E}_{z_s} [\log p(x_{bow}, \hat{y}, z_s)] - \mathbb{E}_{z_s} [\log p(z_s|x_{bow}, \hat{y})] \\
&= \mathbb{E}_{z_s} \left[ \log \frac{p(x_{bow}, \hat{y}, z_s)}{q(z_s|x, \hat{y})} \right] - \mathbb{E}_{z_s} \left[ \log \frac{p(z_s|x_{bow}, \hat{y})}{q(z_s|x, \hat{y})} \right] \\
&= EBLO_{x_{bow}, \hat{y}} - D_{KL}(p(z_s|x_{bow}, \hat{y})||q(z_s|x, \hat{y}))
\end{aligned}$$

$$\begin{aligned}
ELBO_{x_{bow}, \hat{y}} &= \mathbb{E}_{z_s} [\log p(x_{bow}, \hat{y}, z_s)] - \mathbb{E}_{z_s} [\log q(z_s|x, \hat{y})] \\
&= \mathbb{E}_{z_s} [\log p(x_{bow}|\hat{y}, z_s)] + \mathbb{E}_{z_s} [\log p(\hat{y}, z_s)] - \mathbb{E}_{z_s} [\log q(z_s|x, \hat{y})] \\
&= \mathbb{E}_{z_s} [\log p(x_{bow}|\hat{y}, z_s)] + \mathbb{E}_{z_s} [\log p(\hat{y}|z_s)] + \mathbb{E}_{z_s} [p(z_s)] - \mathbb{E}_{z_s} [\log q(z_s|x, \hat{y})] \\
&= \mathbb{E}_{z_s} [\log p(x_{bow}|\hat{y}, z_s)] + \mathbb{E}_{z_s} [\log p(\hat{y}|z_s)] - D_{KL}(q(z_s|x, \hat{y})||p(z_s))
\end{aligned}$$

Where  $p(z) = p(z_s) = \mathcal{N}(0, I)$  is a zero mean diagonal multivariate Gaussian prior, hence the  $D_{KL}(q(z|x)||p(z))$  and  $D_{KL}(q(z_s|x, \hat{y})||p(z_s))$  will be

$$\begin{aligned}
p(z) &= p(z_s) = \mathcal{N}(0, I) \\
D_{KL}(q(z|x)||p(z)) &= 0.5(\sigma^2 + \mu^2 - \log(\sigma^2) - 1) \\
D_{KL}(q(z_s|x, \hat{y})||p(z_s)) &= 0.5(\sigma_s^2 + \mu_s^2 - \log(\sigma_s^2) - 1)
\end{aligned}$$
