# Supplementary material for: Classification aware neural topic model for COVID-19 disinformation categorisation
Source: PubMed Central journal article supplement (PMC7891716; doi:10.1371/journal.pone.0247086), 2021-02-18
Supplement: pone.0247086.s007.pdf [file pone.0247086.s007.pdf]

**S7 Appendix - CANTM confusion matrix**

| Pred/True  | PubAuth | CommSpread | MedAdv | PromActs | Consp | VirTrans | VirOrgn | PubPrep | Vacc | None |
|------------|---------|------------|--------|----------|-------|----------|---------|---------|------|------|
| PubAuth    | 174     | 22         | 4      | 31       | 1     | 8        | 0       | 6       | 2    | 3    |
| CommSpread | 18      | 163        | 5      | 11       | 2     | 5        | 3       | 11      | 2    | 4    |
| MedAdv     | 3       | 3          | 147    | 6        | 4     | 9        | 0       | 0       | 5    | 0    |
| PromActs   | 38      | 17         | 0      | 149      | 5     | 3        | 0       | 5       | 3    | 1    |
| Consp      | 11      | 10         | 1      | 10       | 45    | 4        | 12      | 1       | 2    | 1    |
| VirTrans   | 7       | 14         | 11     | 1        | 4     | 33       | 7       | 0       | 3    | 0    |
| VirOrgn    | 0       | 5          | 3      | 0        | 10    | 2        | 41      | 1       | 1    | 0    |
| PubPrep    | 16      | 17         | 0      | 7        | 0     | 1        | 0       | 19      | 0    | 1    |
| Vacc       | 1       | 0          | 14     | 3        | 1     | 3        | 1       | 0       | 52   | 1    |
| None       | 7       | 20         | 1      | 5        | 2     | 2        | 1       | 3       | 1    | 1    |

**S4 Table.** CANTM confusion matrix
