# Supplementary material for: Classification aware neural topic model for COVID-19 disinformation categorisation
Source: PubMed Central journal article supplement (PMC7891716; doi:10.1371/journal.pone.0247086), 2021-02-18
Supplement: pone.0247086.s008.pdf [file pone.0247086.s008.pdf]

## S8 Appendix – Classification-Aware Topics Examples

Table S5 Table shows examples of classification-aware topics. Classification-aware topics are derived from  $R_s$  in M2 decoder (Section 3.1.5), hence  $R_s$  is ‘aware’ the pre-defined classes but not directly ‘associate’ with it.

Topics 1 and 4 are related to Public Authority about financial actions and official announcement. Topic 2 concerns a Conspiracy theory that is related to ‘virus is lab created as war weapon’. Topic 3 is about economic influences from COVID-19 in Community Spread, and Topic 5 is related to Community Spread in South America.

|         |                                                                                 |
|---------|---------------------------------------------------------------------------------|
| Topic 1 | cure warned kill notice current diseases attending human welfare suspended      |
| Topic 2 | demonstration nih dies kill nature human iraq someone war encourage             |
| Topic 3 | risk hindu san fall economic coronavirus conflict unit bars text                |
| Topic 4 | coronavirus prevent novel kill germany claim un gov eating document             |
| Topic 5 | ecuador first case buried end amazonas distributing recommended decreased april |

**S5 Table.** COVID-19 classification-aware topics from unlabelled data
